# Supplementary material
Source: MDPI journal article supplement (https://www.mdpi.com/search?q=minerals-09-00455)
Supplement: s001 [file minerals-09-00455-s001.pdf]

# Supplementary Materials

**Table S1.** Selenim's minerals: Chemical formula, type locality (TL) and number of localities (NL).

| Mineral          | Chemical Formula                                                                                                                                       | Formation (TL)    | NL  | Reference |
|------------------|--------------------------------------------------------------------------------------------------------------------------------------------------------|-------------------|-----|-----------|
| Achávalite       | FeSe                                                                                                                                                   | Hydrothermal (1)  | 2   | [1]       |
| Aguilarite       | Ag <sub>4</sub> SeS                                                                                                                                    | Hydrothermal (48) | 65  | [2]       |
| Ahlfeldite       | NiSeO <sub>3</sub> ·2H <sub>2</sub> O                                                                                                                  | Weathering (2)    | 2   | [3]       |
| Alfredopetrovite | Al <sub>2</sub> (SeO <sub>3</sub> ) <sub>3</sub> ·6H <sub>2</sub> O                                                                                    | Weathering (3)    | 1   | [4]       |
| Allochalcoselite | CuCu <sub>5</sub> PbO <sub>2</sub> (SeO <sub>3</sub> ) <sub>2</sub> Cl <sub>5</sub>                                                                    | Volcanic (5)      | 1   | [5]       |
| Antimonselite    | Sb <sub>2</sub> Se <sub>3</sub>                                                                                                                        | Hydrothermal (59) | 6   | [6]       |
| Athabascaite     | Cu <sub>5</sub> Se <sub>4</sub>                                                                                                                        | Hydrothermal (37) | 14  | [7]       |
| Bambollaite      | CuSe <sub>2</sub>                                                                                                                                      | Hydrothermal (30) | 3   | [8]       |
| Bellidoite       | Cu <sub>2</sub> Se                                                                                                                                     | Hydrothermal (27) | 6   | [9]       |
| Berzelianite     | Cu <sub>2</sub> Se                                                                                                                                     | Hydrothermal (52) | 61  | [10]      |
| Bohdanowiczite   | AgBiSe <sub>2</sub>                                                                                                                                    | Hydrothermal (33) | 31  | [11]      |
| Bornhardtite     | CoCo <sub>2</sub> Se <sub>4</sub>                                                                                                                      | Hydrothermal (57) | 3   | [12]      |
| Brodtkorbite     | Cu <sub>2</sub> HgSe <sub>2</sub>                                                                                                                      | Hydrothermal (58) | 1   | [13]      |
| Bukovite         | Cu <sub>4</sub> Tl <sub>2</sub> Se <sub>4</sub>                                                                                                        | Hydrothermal (16) | 10  | [14]      |
| Burnsite         | KCdCu <sub>7</sub> (SeO <sub>3</sub> ) <sub>2</sub> O <sub>2</sub> Cl <sub>9</sub>                                                                     | Volcanic (5)      | 1   | [15]      |
| Bytízite         | Cu <sub>3</sub> SbSe <sub>3</sub>                                                                                                                      | Hydrothermal (51) | 2   | [16]      |
| Cadmoselite      | CdSe                                                                                                                                                   | Hydrothermal (56) | 3   | [17]      |
| Carlosruizite    | K <sub>6</sub> Na <sub>4</sub> Na <sub>6</sub> Mg <sub>10</sub> (SeO <sub>4</sub> ) <sub>12</sub> (IO <sub>3</sub> ) <sub>12</sub> ·12H <sub>2</sub> O | Weathering (11)   | 2   | [18]      |
| Cerrromojonite   | CuPbBiSe <sub>3</sub>                                                                                                                                  | Hydrothermal (3)  | 1   | [19]      |
| Chalcomenite     | CuSeO <sub>3</sub> ·2H <sub>2</sub> O                                                                                                                  | Weathering (1)    | 35  | [20]      |
| Chaméanite       | (Cu <sub>3</sub> Fe) <sub>24</sub> AsSe <sub>4</sub>                                                                                                   | Hydrothermal (20) | 3   | [21]      |
| Chloromenite     | Cu <sub>9</sub> (SeO <sub>3</sub> ) <sub>4</sub> O <sub>2</sub> Cl <sub>6</sub>                                                                        | Volcanic (5)      | 1   | [22]      |
| Chrisstanleyite  | Ag <sub>2</sub> Pd <sub>3</sub> Se <sub>4</sub>                                                                                                        | Hydrothermal (28) | 5   | [23]      |
| Clausthalite     | PbSe                                                                                                                                                   | Hydrothermal (54) | 239 | [24]      |
| Cobaltomenite    | CoSeO <sub>3</sub> ·2H <sub>2</sub> O                                                                                                                  | Weathering (1)    | 12  | [25]      |
| Crookesite       | Cu <sub>7</sub> TlSe <sub>4</sub>                                                                                                                      | Hydrothermal (52) | 12  | [26]      |
| Demesmaekerite   | Pb <sub>2</sub> Cu <sub>5</sub> (UO <sub>2</sub> ) <sub>2</sub> (SeO <sub>3</sub> ) <sub>6</sub> (OH) <sub>6</sub> ·2H <sub>2</sub> O                  | Weathering (7)    | 2   | [27]      |
| Derriksite       | Cu <sub>4</sub> (UO <sub>2</sub> )(SeO <sub>3</sub> ) <sub>2</sub> (OH) <sub>6</sub> ·H <sub>2</sub> O                                                 | Weathering (7)    | 1   | [28]      |
| Downeyite        | SeO <sub>2</sub>                                                                                                                                       | Weathering (26)   | 2   | [29]      |
| Drysdallite      | MoSe <sub>2</sub>                                                                                                                                      | Hydrothermal (31) | 2   | [30]      |
| Dzharkenite      | FeSe <sub>2</sub>                                                                                                                                      | Hydrothermal (55) | 4   | [31]      |
| Eldragónite      | Cu <sub>6</sub> BiSe <sub>4</sub> (Se <sub>2</sub> )                                                                                                   | Hydrothermal (3)  | 1   | [32]      |
| Eskebornite      | CuFeSe <sub>2</sub>                                                                                                                                    | Hydrothermal (24) | 22  | [33]      |
| Eucairite        | CuAgSe                                                                                                                                                 | Hydrothermal (52) | 51  | [34]      |
| Favreauite       | PbBiCu <sub>6</sub> O <sub>4</sub> (SeO <sub>3</sub> ) <sub>4</sub> (OH)·H <sub>2</sub> O                                                              | Weathering (3)    | 1   | [35]      |
| Ferroselite      | FeSe <sub>2</sub>                                                                                                                                      | Hydrothermal (56) | 49  | [36]      |
| Fischesserite    | Ag <sub>3</sub> AuSe <sub>2</sub>                                                                                                                      | Hydrothermal (46) | 19  | [37]      |
| Francisite       | Cu <sub>3</sub> Bi(SeO <sub>3</sub> ) <sub>2</sub> O <sub>2</sub> Cl                                                                                   | Weathering (4)    | 2   | [38]      |
| Freboldite       | CoSe                                                                                                                                                   | Hydrothermal (57) | 4   | [20]      |
| Geffroyite       | Cu <sub>9</sub> Se <sub>8</sub>                                                                                                                        | Hydrothermal (20) | 6   | [39]      |
| Georgbokiite     | Cu <sub>5</sub> (SeO <sub>3</sub> ) <sub>2</sub> O <sub>2</sub> Cl <sub>2</sub>                                                                        | Volcanic (5)      | 2   | [40]      |
| Giraudite        | Cu <sub>6</sub> Cu <sub>4</sub> Zn <sub>2</sub> (AsSe <sub>3</sub> ) <sub>4</sub> S                                                                    | Hydrothermal (20) | 5   | [20]      |
| Grundmannite     | CuBiSe <sub>2</sub>                                                                                                                                    | Hydrothermal (3)  | 2   | [41]      |
| Guanajuatite     | Bi <sub>2</sub> Se <sub>3</sub>                                                                                                                        | Hydrothermal (49) | 30  | [42]      |
| Guilleminite     | Ba(UO <sub>2</sub> ) <sub>3</sub> (SeO <sub>3</sub> ) <sub>2</sub> (OH) <sub>4</sub> ·3H <sub>2</sub> O                                                | Weathering (7)    | 3   | [43]      |
| Hakite           | Cu <sub>6</sub> Cu <sub>4</sub> Hg <sub>2</sub> (SbSe <sub>3</sub> ) <sub>4</sub> Se                                                                   | Hydrothermal (46) | 12  | [44]      |

|                  |                                                                                                    |                   |     |      |
|------------------|----------------------------------------------------------------------------------------------------|-------------------|-----|------|
| Hansblockite     | $\text{CuBiSe}_2$                                                                                  | Hydrothermal (3)  | 1   | [45] |
| Haynesite        | $(\text{UO}_2)_3(\text{SeO}_3)_2(\text{OH})_2 \cdot 5\text{H}_2\text{O}$                           | Weathering (9)    | 1   | [46] |
| Ilinskite        | $\text{NaCu}_5(\text{SeO}_3)_2\text{O}_2\text{Cl}_3$                                               | Volcanic (5)      | 2   | [47] |
| Jacutingaite     | $\text{Pt}_2\text{HgSe}_3$                                                                         | Hydrothermal (29) | 2   | [48] |
| Jagüéite         | $\text{Cu}_2\text{Pd}_3\text{Se}_4$                                                                | Hydrothermal (23) | 2   | [49] |
| Jolliffeite      | $\text{NiAsSe}$                                                                                    | Hydrothermal (19) | 3   | [50] |
| Kalungaite       | $\text{PdAsSe}$                                                                                    | Hydrothermal (17) | 1   | [51] |
| Kawazulite       | $\text{Bi}_2\text{Te}_2\text{Se}$                                                                  | Hydrothermal (25) | 25  | [52] |
| Kitkaite         | $\text{NiTeSe}$                                                                                    | Hydrothermal (32) | 1   | [12] |
| Klockmannite     | $\text{CuSe}$                                                                                      | Hydrothermal (35) | 57  | [53] |
| Krut'aite        | $\text{CuSe}_2$                                                                                    | Hydrothermal (43) | 7   | [54] |
| Kullerudite      | $\text{NiSe}_2$                                                                                    | Hydrothermal (32) | 3   | [55] |
| Kurilite         | $\text{Ag}_8\text{Te}_3\text{Se}$                                                                  | Hydrothermal (45) | 2   | [56] |
| Laitakarite      | $\text{Bi}_4\text{Se}_3$                                                                           | Hydrothermal (41) | 21  | [57] |
| Laphamite        | $\text{As}_2\text{Se}_3$                                                                           | Hydrothermal (18) | 1   | [58] |
| Larisaite        | $\text{Na}(\text{H}_3\text{O})(\text{UO}_2)_3(\text{SeO}_3)_2\text{O}_2 \cdot 4\text{H}_2\text{O}$ | Weathering (9)    | 1   | [59] |
| Litochlebite     | $\text{Ag}_2\text{PbBi}_4\text{Se}_8$                                                              | Hydrothermal (34) | 1   | [60] |
| Llantenesite     | $\text{Cu}_6\text{Al}(\text{SeO}_4)(\text{OH})_{12}\text{Cl} \cdot 3\text{H}_2\text{O}$            | Weathering (60)   | 1   | [61] |
| Luberoite        | $\text{Pt}_5\text{Se}_4$                                                                           | Hydrothermal (36) | 2   | [62] |
| Luxembourgite    | $\text{AgCuPbBi}_4\text{Se}_8$                                                                     | Hydrothermal (61) | 1   | [63] |
| Mäkinenite       | $\text{NiSe}$                                                                                      | Hydrothermal (32) | 2   | [55] |
| Mandarinoite     | $\text{Fe}_2(\text{SeO}_3)_3 \cdot 6\text{H}_2\text{O}$                                            | Weathering (2)    | 13  | [64] |
| Marthozite       | $\text{Cu}(\text{UO}_2)_3(\text{SeO}_3)_2\text{O}_2 \cdot 8\text{H}_2\text{O}$                     | Weathering (7)    | 2   | [65] |
| Mgriite          | $\text{Cu}_3\text{AsSe}_3$                                                                         | Hydrothermal (50) | 1   | [66] |
| Miessiite        | $\text{Pd}_{11}\text{Te}_2\text{Se}_2$                                                             | Hydrothermal (38) | 1   | [67] |
| Milotaite        | $\text{PdSbSe}$                                                                                    | Hydrothermal (46) | 1   | [68] |
| Molybdomenite    | $\text{PbSeO}_3$                                                                                   | Weathering (1)    | 13  | [25] |
| Munakataite      | $\text{Pb}_2\text{Cu}_2(\text{SeO}_3)(\text{SO}_4)(\text{OH})_4$                                   | Weathering (12)   | 16  | [69] |
| Naumannite       | $\text{Ag}_2\text{Se}$                                                                             | Hydrothermal (24) | 156 | [70] |
| Nestolaite       | $\text{CaSeO}_3 \cdot \text{H}_2\text{O}$                                                          | Weathering (13)   | 2   | [71] |
| Nevskite         | $\text{BiSe}$                                                                                      | Hydrothermal (39) | 5   | [72] |
| Nickeltyrrellite | $\text{CuNi}_2\text{Se}_4$                                                                         | Hydrothermal (3)  | 1   | [73] |
| Nicksobolevite   | $\text{Cu}_7(\text{SeO}_3)_2\text{O}_2\text{Cl}_6$                                                 | Volcanic (5)      | 1   | [74] |
| Olsacherite      | $\text{Pb}_2(\text{SeO}_4)(\text{SO}_4)$                                                           | Weathering (2)    | 8   | [75] |
| Oosterboschite   | $\text{Pd}_7\text{Se}_5$                                                                           | Hydrothermal (7)  | 4   | [76] |
| Orlandiite       | $\text{Pb}_3(\text{SeO}_3)\text{Cl}_4 \cdot \text{H}_2\text{O}$                                    | Weathering (6)    | 1   | [77] |
| Padmaite         | $\text{PdBiSe}$                                                                                    | Hydrothermal (53) | 3   | [78] |
| Palladseite      | $\text{Pd}_{17}\text{Se}_{15}$                                                                     | Hydrothermal (29) | 5   | [79] |
| Parageorgbokiite | $\text{Cu}_5(\text{SeO}_3)_2\text{O}_2\text{Cl}_2$                                                 | Volcanic (5)      | 1   | [80] |
| Paraguanajuatite | $\text{Bi}_2\text{Se}_3$                                                                           | Hydrothermal (49) | 7   | [81] |
| Pauladamsite     | $\text{Cu}_4(\text{SeO}_3)(\text{SO}_4)(\text{OH})_4 \cdot 2\text{H}_2\text{O}$                    | Weathering (14)   | 1   | [82] |
| Penroseite       | $\text{NiSe}_2$                                                                                    | Hydrothermal (2)  | 14  | [83] |
| Permingeatite    | $\text{Cu}_3\text{SbSe}_4$                                                                         | Hydrothermal (46) | 5   | [84] |
| Petříčekite      | $\text{CuSe}_2$                                                                                    | Hydrothermal (46) | 1   | [85] |
| Petrovicite      | $\text{Cu}_3\text{HgPbBiSe}_5$                                                                     | Hydrothermal (43) | 6   | [86] |
| Piretite         | $\text{Ca}(\text{UO}_2)_3(\text{SeO}_3)_2(\text{OH})_4 \cdot 4\text{H}_2\text{O}$                  | Weathering (8)    | 1   | [87] |
| Plumboselite     | $\text{Pb}_3(\text{SeO}_3)\text{O}_2$                                                              | Weathering (15)   | 1   | [88] |
| Poubaite         | $\text{PbBi}_2\text{Se}_4$                                                                         | Hydrothermal (40) | 4   | [89] |
| Prewittite       | $\text{K}_2\text{Pb}_3\text{Zn}_2\text{Cu}_{12}(\text{SeO}_3)_4\text{O}_4\text{Cl}_{20}$           | Volcanic (5)      | 1   | [90] |
| Příbramite       | $\text{CuSbSe}_2$                                                                                  | Hydrothermal (51) | 3   | [91] |
| Quijarroite      | $\text{Cu}_6\text{HgPb}_2\text{Bi}_4\text{Se}_{12}$                                                | Hydrothermal (3)  | 1   | [92] |
| Ramaccioniite    | $\text{Cu}_4[\text{SeO}_4](\text{OH})_6$                                                           | Weathering (60)   | 1   | [93] |
| Sabatierite      | $\text{Cu}_6\text{TlSe}_4$                                                                         | Hydrothermal (16) | 4   | [94] |

|                  |                                |                   |     |       |
|------------------|--------------------------------|-------------------|-----|-------|
| Sarrabusite      | $Pb_5Cu(SeO_3)_4Cl_4$          | Weathering (6)    | 1   | [95]  |
| Schlemaite       | $Cu_6PbSe_4$                   | Hydrothermal (50) | 1   | [96]  |
| Schmiederite     | $Pb_2Cu_2(SeO_3)(SeO_4)(OH)_4$ | Weathering (10)   | 14  | [97]  |
| Sederholmite     | NiSe                           | Hydrothermal (32) | 1   | [55]  |
| Selenium         | Se                             | Weathering (?)    | 134 | [98]  |
| Selenojalpaite   | $Ag_3CuSe_2$                   | Hydrothermal (52) | 1   | [99]  |
| Selenopolybasite | $CuAg_6Ag_9Sb_2S_9Se_2$        | Hydrothermal (21) | 3   | [100] |
| Selenostephanite | $Ag_5(SbSe_3)Se$               | Hydrothermal (47) | 2   | [101] |
| Skippenite       | $Bi_2Se_2Te$                   | Hydrothermal (42) | 6   | [102] |
| Sofiite          | $Zn_2(SeO_3)Cl_2$              | Volcanic (5)      | 2   | [103] |
| Stilleite        | ZnSe                           | Hydrothermal (8)  | 7   | [104] |
| Sudovikovite     | $PtSe_2$                       | Hydrothermal (53) | 3   | [105] |
| Telluronevskite  | $Bi_3TeSe_2$                   | Hydrothermal (44) | 1   | [106] |
| Tiemannite       | HgSe                           | Hydrothermal (54) | 75  | [107] |
| Tischendorfite   | $Pd_8Hg_3Se_9$                 | Hydrothermal (24) | 1   | [108] |
| Trogtalite       | $CoSe_2$                       | Hydrothermal (57) | 9   | [12]  |
| Trüstedtite      | $NiNi_2Se_4$                   | Hydrothermal (32) | 4   | [55]  |
| Tyrrellite       | $CuCo_2Se_4$                   | Hydrothermal (22) | 13  | [109] |
| Umangite         | $Cu_3Se_2$                     | Hydrothermal (35) | 68  | [110] |
| Verbeekite       | $PdSe_2$                       | Hydrothermal (7)  | 2   | [111] |
| Vihorlatite      | $Bi_{24}Se_{17}Te_4$           | Hydrothermal (44) | 1   | [112] |
| Watkinsonite     | $Cu_2PbBi_4Se_8$               | Hydrothermal (42) | 5   | [102] |
| Wilkmanite       | $Ni_3Se_4$                     | Hydrothermal (32) | 1   | [55]  |
| Zincomenite      | $ZnSeO_3$                      | Volcanic (5)      | 1   | [113] |

Note: (1) – Cerro de Cacheuta Mine, Mendoza, Argentina; (2) – Virgen de Surumi mine, Potosí Department, Bolivia; (3) – El Dragón mine, Potosí Department, Bolivia; (4) – Iron Monarch open cut, South Australia; (5) – Tolbachik volcano, Kamchatka, Russia; (6) – Baccu Locci Mine, Sardinia, Italy; (7) – Musonoi Mine, Katanga, Democratic Republic of Congo; (8) – Shinkolobwe Mine, Katanga, Democratic Republic of Congo; (9) – Repete Mine, Utah, USA; (10) – El Cóndor Mine, Vinchina Department, Argentina; (11) – Zapiga, Tarapacá Region, Chile; (12) – Kato mine, Kyushu Region, Japan; (13) – Little Eva Mine, Utah, USA; (14) – Santa Rosa Mine, California, USA; (15) – Tsumeb Mine, Otjikoto Region, Namibia; (16) – Bukov Mine, Moravia, Czech Republic; (17) – Buraco Do Ouro Mine, Goiás, Brazil; (18) – Burnside, Pennsylvania, USA; (19) – Fish Hook Bay property, Black Bay Uranium Mines, Beaverlodge Lake area, Saskatchewan, Canada; (20) – Chaméane Uranium Deposit, Auvergne-Rhône-Alpes, France; (21) – De Lamar Mine, Idaho, USA; (22) – Eagle Claims, Saskatchewan, Canada; (23) – El Chire Prospect, La Rioja, Argentina; (24) – Eskaborn Adit, Saxony-Anhalt, Germany; (25) – Kawazu mine, Honshu Island, Japan; (26) – Forestville, Pennsylvania, USA; (27) – Habří Mine, Moravia, Czech Republic; (28) – Hope's Nose, Devon, England, UK; (29) – Itabira, Minas Gerais, Brazil; (30) – Moctezuma Mine, Sonora, Mexico; (31) – Kampijimpanga, North-Western Province, Zambia; (32) – Kitka River Valley, Kuusamo, Finland; (33) – Kletno, Lower Silesia, Poland; (34) – Zálesí, Javorník, Olomouc Region, Moravia, Czech Republic; (35) – Las Asperesas mine, La Rioja, Argentina; (36) – Lubero Region, Kivu, Democratic Republic Of Congo; (37) – Martin Lake mine, Saskatchewan, Canada; (38) – Miessijoki River, Lapland Region, Finland; (39) – Nevskoe W-Sn Deposit, Magadanskaya Oblast', Russia; (40) – Oldřichov, Bohemia, Czech Republic; (41) – Orijärvi, Salo, Finland; (42) – Otish Mountains U deposit, Québec, Canada; (43) – Petrovice, Moravia, Czech Republic; (44) – Poruba Pod Vihorlatom, Košice Region, Slovakia; (45) – Prasolovskoe Au Deposit, Kunashir Island, Russia; (46) – Předbořice, Bohemia, Czech Republic; (47) – Rudnaya Sopka Ag-Au Deposit, Chukotskii Autonomous Okrug, Russia; (48) – San Carlos Mine, Guanajuato, Mexico; (49) – Santa Catarina Mine, Guanajuato, Mexico; (50) – Schlema-Hartenstein District, Saxony, Germany; (51) – Háje, Příbram, Central Bohemia Region, Bohemia, Czech Republic; (52) – Skrikerum Mine, Östergötland, Sweden; (53) –

Srednyaya Padma mine, Karelia Republic, Russia; (54) – St Lorenz Mine, Lower Saxony, Germany; (55) – Suluchekinskoye Se-U deposit, Almaty Province, Kazakhstan; (56) – Ust' Uyok deposit, Tuva Republic, Russia; (57) – Trogtal Quarries, Lower Saxony, Germany; (58) – Tumiñico Mine, La Rioja, Argentina; (59) – U deposit No. 504, Guizhou Province, China; (60) – Mina San Pedro, Los Llantenes mining district, Vinchina Department, La Rioja Province, Argentina; (61) – Bivels, North of the Grand-Duchy of Luxembourg.

**Table S2.** Classification of mineral systems of selenium minerals.

| <b>N</b>               | <b>System</b> | <b>Mineral</b>     | <b>Chemical formula</b>           |                                   |
|------------------------|---------------|--------------------|-----------------------------------|-----------------------------------|
| <b>Native elements</b> |               |                    |                                   |                                   |
| 1                      | Se            | Selenium           | Se                                |                                   |
| <b>Oxides</b>          |               |                    |                                   |                                   |
| 2                      | OSe           | Downeyite          | SeO <sub>2</sub>                  |                                   |
| <b>Selenides</b>       |               |                    |                                   |                                   |
| 2                      | SeAs          | Laphamite          | As <sub>2</sub> Se <sub>3</sub>   |                                   |
|                        | SeSb          | Antimonselite      | Sb <sub>2</sub> Se <sub>3</sub>   |                                   |
|                        | SeBi          |                    | Nevskite                          | BiSe                              |
|                        |               |                    | Guanajuatite                      | Bi <sub>2</sub> Se <sub>3</sub>   |
|                        |               |                    | Paraguanajuatite                  | Bi <sub>2</sub> Se <sub>3</sub>   |
|                        |               |                    | Laitakarite                       | Bi <sub>4</sub> Se <sub>3</sub>   |
|                        | SePb          | Clausthalite       | PbSe                              |                                   |
|                        | SeMo          | Drysdallite        | MoSe <sub>2</sub>                 |                                   |
|                        | SeFe          |                    | Achávalite                        | FeSe                              |
|                        |               |                    | Dzharkenite                       | FeSe <sub>2</sub>                 |
|                        |               |                    | Ferroselite                       | FeSe <sub>2</sub>                 |
|                        | SeCo          |                    | Bornhardtite                      | CoCo <sub>2</sub> Se <sub>4</sub> |
|                        |               |                    | Freboldite                        | CoSe                              |
|                        |               |                    | Trogtalite                        | CoSe <sub>2</sub>                 |
|                        | SeNi          |                    | Sederholmite                      | NiSe                              |
|                        |               |                    | Mäkinenite                        | NiSe                              |
|                        |               |                    | Penroseite                        | NiSe <sub>2</sub>                 |
|                        |               |                    | Kullerudite                       | NiSe <sub>2</sub>                 |
|                        |               |                    | Trüstedtite                       | NiNi <sub>2</sub> Se <sub>4</sub> |
|                        |               |                    | Wilkmanite                        | Ni <sub>3</sub> Se <sub>4</sub>   |
|                        | SePd          |                    | Verbeekite                        | PdSe <sub>2</sub>                 |
|                        |               |                    | Oosterboschite                    | Pd <sub>7</sub> Se <sub>5</sub>   |
|                        |               | Palladseite        | Pd <sub>17</sub> Se <sub>15</sub> |                                   |
| SePt                   |               | Sudovikovite       | PtSe <sub>2</sub>                 |                                   |
|                        |               | Luberoite          | Pt <sub>5</sub> Se <sub>4</sub>   |                                   |
| SeCu                   |               | Klockmannite       | CuSe                              |                                   |
|                        |               | Krut'aite          | CuSe <sub>2</sub>                 |                                   |
|                        |               | Petříčekite        | CuSe <sub>2</sub>                 |                                   |
|                        |               | Bambollaite        | CuSe <sub>2</sub>                 |                                   |
|                        |               | Bellidoite         | Cu <sub>2</sub> Se                |                                   |
|                        |               | Berzelianite       | Cu <sub>2</sub> Se                |                                   |
|                        |               | Umangite           | Cu <sub>3</sub> Se <sub>2</sub>   |                                   |
|                        |               | Athabascaite       | Cu <sub>5</sub> Se <sub>4</sub>   |                                   |
|                        |               | Geffroyite         | Cu <sub>9</sub> Se <sub>8</sub>   |                                   |
| SeAg                   | Naumannite    | Ag <sub>2</sub> Se |                                   |                                   |
| SeZn                   | Stilleite     | ZnSe               |                                   |                                   |

|   |            |                  |                                                                                      |
|---|------------|------------------|--------------------------------------------------------------------------------------|
|   | SeCd       | Cadmoselite      | CdSe                                                                                 |
|   | SeHg       | Tiemannite       | HgSe                                                                                 |
|   | SSeAg      | Aguilarite       | Ag <sub>4</sub> SeS                                                                  |
|   |            | Kawazulite       | Bi <sub>2</sub> Te <sub>2</sub> Se                                                   |
|   | SeTeBi     | Skippenite       | Bi <sub>2</sub> Se <sub>2</sub> Te                                                   |
|   |            | Telluronevskite  | Bi <sub>3</sub> TeSe <sub>2</sub>                                                    |
|   |            | Vihorlatite      | Bi <sub>24</sub> Se <sub>17</sub> Te <sub>4</sub>                                    |
|   | SeTeNi     | Kitkaite         | NiTeSe                                                                               |
|   | SeTePd     | Miessiite        | Pd <sub>11</sub> Te <sub>2</sub> Se <sub>2</sub>                                     |
|   | SeTeAg     | Kurilite         | Ag <sub>8</sub> Te <sub>3</sub> Se                                                   |
|   | SeAsNi     | Jolliffeite      | NiAsSe                                                                               |
|   | SeAsPd     | Kalungaite       | PdAsSe                                                                               |
|   | SeAsCu     | Mgriite          | Cu <sub>3</sub> AsSe <sub>3</sub>                                                    |
|   | SeSbPd     | Milotaite        | PdSbSe                                                                               |
|   |            | Bytízite         | Cu <sub>3</sub> SbSe <sub>3</sub>                                                    |
|   | SeSbCu     | Permingeatite    | Cu <sub>3</sub> SbSe <sub>4</sub>                                                    |
|   |            | Příbramite       | CuSbSe <sub>2</sub>                                                                  |
|   | SeSbAg     | Selenostephanite | Ag <sub>5</sub> (SbSe <sub>3</sub> )Se                                               |
|   | SeBiPb     | Poubaite         | PbBi <sub>2</sub> Se <sub>4</sub>                                                    |
|   | SeBiPd     | Padmaite         | PdBiSe                                                                               |
| 3 |            | Grundmannite     | CuBiSe <sub>2</sub>                                                                  |
|   | SeBiCu     | Hansblockite     | CuBiSe <sub>2</sub>                                                                  |
|   |            | Eldragónite      | Cu <sub>6</sub> BiSe <sub>4</sub> (Se <sub>2</sub> )                                 |
|   | SeBiAg     | Bohdanowiczite   | AgBiSe <sub>2</sub>                                                                  |
|   | SePbCu     | Schlemaite       | Cu <sub>6</sub> PbSe <sub>4</sub>                                                    |
|   |            | Bukovite         | Cu <sub>4</sub> Tl <sub>2</sub> Se <sub>4</sub>                                      |
|   | SeTlCu     | Sabatierite      | Cu <sub>6</sub> TlSe <sub>4</sub>                                                    |
|   |            | Crookesite       | Cu <sub>7</sub> TlSe <sub>4</sub>                                                    |
|   | SeFeCu     | Eskebornite      | CuFeSe <sub>2</sub>                                                                  |
|   | SeCoCu     | Tyrrellite       | CuCo <sub>2</sub> Se <sub>4</sub>                                                    |
|   | SeNiCu     | Nickeltyrrellite | CuNi <sub>2</sub> Se <sub>4</sub>                                                    |
|   | SePdCu     | Jagüéite         | Cu <sub>2</sub> Pd <sub>3</sub> Se <sub>4</sub>                                      |
|   | SePdAg     | Chrisstanleyite  | Ag <sub>2</sub> Pd <sub>3</sub> Se <sub>4</sub>                                      |
|   | SePdHg     | Tischendorfite   | Hg <sub>3</sub> Pd <sub>8</sub> Se <sub>9</sub>                                      |
|   | SePtHg     | Jacutingaite     | Pt <sub>2</sub> HgSe <sub>3</sub>                                                    |
|   | SeCuAg     | Eucairite        | CuAgSe                                                                               |
|   |            | Selenojalpaite   | Ag <sub>3</sub> CuSe <sub>2</sub>                                                    |
|   | SeCuHg     | Brodtkorbite     | Cu <sub>2</sub> HgSe <sub>2</sub>                                                    |
|   | SeAgAu     | Fischesserite    | AgAuSe <sub>2</sub>                                                                  |
| 4 | SeAsFeCu   | Chaméanite       | (Cu <sub>3</sub> Fe) <sub>Σ4</sub> AsSe <sub>4</sub>                                 |
|   | SeSbCuHg   | Hakite           | Cu <sub>6</sub> Cu <sub>4</sub> Hg <sub>2</sub> (SbSe <sub>3</sub> ) <sub>4</sub> Se |
|   | SeBiPbCu   | Cerromojonite    | CuPbBiSe <sub>3</sub>                                                                |
|   | SeBiPbCu   | Watkinsonite     | Cu <sub>2</sub> PbBi <sub>4</sub> Se <sub>8</sub>                                    |
|   | SeBiPbAg   | Litochlebite     | Ag <sub>2</sub> PbBi <sub>4</sub> Se <sub>8</sub>                                    |
|   | SSeAsZnCu  | Giraudite        | Cu <sub>6</sub> Cu <sub>4</sub> Zn <sub>2</sub> (AsSe <sub>3</sub> ) <sub>4</sub> S  |
|   | SSeSbCuAg  | Selenopolybasite | CuAg <sub>6</sub> Ag <sub>9</sub> Sb <sub>2</sub> S <sub>9</sub> Se <sub>2</sub>     |
| 5 | SeBiPbCuHg | Petrovicite      | Cu <sub>3</sub> HgPbBiSe <sub>5</sub>                                                |
|   |            | Quijarroite      | Cu <sub>6</sub> HgPb <sub>2</sub> Bi <sub>4</sub> Se <sub>12</sub>                   |
|   | SeBiPbCuAg | Luxembourgite    | AgCuPbBi <sub>4</sub> Se <sub>8</sub>                                                |

### Selenites

#### I. Selenites without H<sub>2</sub>O

|   |              |                  |                                                                                                                                  |
|---|--------------|------------------|----------------------------------------------------------------------------------------------------------------------------------|
|   | OSePb        | Molybdomenite    | PbSeO <sub>3</sub>                                                                                                               |
|   |              | Plumboselite     | Pb <sub>3</sub> (SeO <sub>3</sub> )O <sub>2</sub>                                                                                |
|   | OSeZn        | Zincomenite      | ZnSeO <sub>3</sub>                                                                                                               |
| 3 |              | Georgbokiite     | Cu <sub>5</sub> (SeO <sub>3</sub> ) <sub>2</sub> O <sub>2</sub> Cl <sub>2</sub>                                                  |
|   | OCiSeCu      | Parageorgbokiite | Cu <sub>5</sub> (SeO <sub>3</sub> ) <sub>2</sub> O <sub>2</sub> Cl <sub>2</sub>                                                  |
|   |              | Nicksobolevite   | Cu <sub>7</sub> (SeO <sub>3</sub> ) <sub>2</sub> O <sub>2</sub> Cl <sub>6</sub>                                                  |
|   |              | Chloromenite     | Cu <sub>9</sub> (SeO <sub>3</sub> ) <sub>4</sub> O <sub>2</sub> Cl <sub>6</sub>                                                  |
|   | OCiSeZn      | Sofiite          | Zn <sub>2</sub> (SeO <sub>3</sub> )Cl <sub>2</sub>                                                                               |
|   | OCiSeBiCu    | Francisite       | Cu <sub>3</sub> Bi(SeO <sub>3</sub> ) <sub>2</sub> O <sub>2</sub> Cl                                                             |
| 5 |              | Sarrabusite      | Pb <sub>5</sub> Cu(SeO <sub>3</sub> ) <sub>4</sub> Cl <sub>4</sub>                                                               |
|   | OCiSePbCu    | Allochalcocelite | CuCu <sub>5</sub> PbO <sub>2</sub> (SeO <sub>3</sub> ) <sub>2</sub> Cl <sub>5</sub>                                              |
|   | OCiSeCuNa    | Ilinskite        | NaCu <sub>5</sub> (SeO <sub>3</sub> ) <sub>2</sub> O <sub>2</sub> Cl <sub>3</sub>                                                |
| 6 | OCiSeCdCuK   | Burnsite         | KCdCu <sub>7</sub> (SeO <sub>3</sub> ) <sub>2</sub> O <sub>2</sub> Cl <sub>9</sub>                                               |
| 7 | OCiSePbZnCuK | Prewittite       | K <sub>2</sub> Pb <sub>3</sub> Zn <sub>2</sub> Cu <sub>12</sub> (SeO <sub>3</sub> ) <sub>4</sub> O <sub>4</sub> Cl <sub>20</sub> |

## II. Selenites containing H<sub>2</sub>O

|   |            |                  |                                                                                                                                       |
|---|------------|------------------|---------------------------------------------------------------------------------------------------------------------------------------|
|   | OHSeAl     | Alfredopetrovite | Al <sub>2</sub> (SeO <sub>3</sub> ) <sub>3</sub> ·6H <sub>2</sub> O                                                                   |
|   | OHSeCo     | Cobaltomenite    | CoSeO <sub>3</sub> ·2H <sub>2</sub> O                                                                                                 |
|   | OHSeFe     | Mandarinoite     | Fe <sub>2</sub> (SeO <sub>3</sub> ) <sub>3</sub> ·6H <sub>2</sub> O                                                                   |
| 4 |            | Ahlfeldite       | NiSeO <sub>3</sub> ·2H <sub>2</sub> O                                                                                                 |
|   | OHSeCu     | Chalcomenite     | CuSeO <sub>3</sub> ·2H <sub>2</sub> O                                                                                                 |
|   | OHSeU      | Haynesite        | (UO <sub>2</sub> ) <sub>3</sub> (SeO <sub>3</sub> ) <sub>2</sub> (OH) <sub>2</sub> ·5H <sub>2</sub> O                                 |
|   | OHSeCa     | Nestolaite       | CaSeO <sub>3</sub> ·H <sub>2</sub> O                                                                                                  |
|   | OHCiSePb   | Orlandiite       | Pb <sub>3</sub> (SeO <sub>3</sub> )Cl <sub>4</sub> ·H <sub>2</sub> O                                                                  |
|   | OHSSeCu    | Pauladamsite     | Cu <sub>4</sub> (SeO <sub>3</sub> )(SO <sub>4</sub> )(OH) <sub>4</sub> ·2H <sub>2</sub> O                                             |
| 5 |            | Derriksite       | Cu <sub>4</sub> (UO <sub>2</sub> )(SeO <sub>3</sub> ) <sub>2</sub> (OH) <sub>6</sub> ·H <sub>2</sub> O                                |
|   | OHSeCuU    | Marthozite       | Cu(UO <sub>2</sub> ) <sub>3</sub> (SeO <sub>3</sub> ) <sub>2</sub> O <sub>2</sub> ·8H <sub>2</sub> O                                  |
|   | OHSeUCa    | Piretite         | Ca(UO <sub>2</sub> ) <sub>3</sub> (SeO <sub>3</sub> ) <sub>2</sub> (OH) <sub>4</sub> ·4H <sub>2</sub> O                               |
|   | OHSeUBa    | Guilleminite     | Ba(UO <sub>2</sub> ) <sub>3</sub> (SeO <sub>3</sub> ) <sub>2</sub> (OH) <sub>4</sub> ·3H <sub>2</sub> O                               |
|   | OHSeUNa    | Larisaite        | Na(H <sub>3</sub> O)(UO <sub>2</sub> ) <sub>3</sub> (SeO <sub>3</sub> ) <sub>2</sub> O <sub>2</sub> ·4H <sub>2</sub> O                |
| 6 |            | Munakataite      | Pb <sub>2</sub> Cu <sub>2</sub> (SeO <sub>3</sub> )(SO <sub>4</sub> )(OH) <sub>4</sub>                                                |
|   | OHSeBiPbCu | Favreaute        | PbBiCu <sub>6</sub> O <sub>4</sub> (SeO <sub>3</sub> ) <sub>4</sub> (OH)·H <sub>2</sub> O                                             |
|   | OHSePbCuU  | Demesmaekerite   | Pb <sub>2</sub> Cu <sub>5</sub> (UO <sub>2</sub> ) <sub>2</sub> (SeO <sub>3</sub> ) <sub>6</sub> (OH) <sub>6</sub> ·2H <sub>2</sub> O |

## Selenates

### I. Selenates without H<sub>2</sub>O

|   |        |             |                                                       |
|---|--------|-------------|-------------------------------------------------------|
| 4 | OSSePb | Olsacherite | Pb <sub>2</sub> (SeO <sub>4</sub> )(SO <sub>4</sub> ) |
|---|--------|-------------|-------------------------------------------------------|

### II. Selenates containing H<sub>2</sub>O

|   |            |               |                                                                                                                                                        |
|---|------------|---------------|--------------------------------------------------------------------------------------------------------------------------------------------------------|
| 4 | OHSeCu     | Ramaccioniite | Cu <sub>4</sub> (SeO <sub>4</sub> )(OH) <sub>6</sub>                                                                                                   |
| 5 | OHSePbCu   | Schmiederite  | Pb <sub>2</sub> Cu <sub>2</sub> (SeO <sub>3</sub> )(SeO <sub>4</sub> )(OH) <sub>4</sub>                                                                |
| 6 | OHCiSeAlCu | Llantenesite  | Cu <sub>6</sub> Al(SeO <sub>4</sub> )(OH) <sub>12</sub> Cl·3H <sub>2</sub> O                                                                           |
| 7 | OHISeMgNaK | Carlosruizite | K <sub>6</sub> Na <sub>4</sub> Na <sub>6</sub> Mg <sub>10</sub> (SeO <sub>4</sub> ) <sub>12</sub> (IO <sub>3</sub> ) <sub>12</sub> ·12H <sub>2</sub> O |

## References

- Olsacher, J. Achavalita, seleniuro de hierro. Nueva especie mineral. *Boletín de la Facultad de Ciencias Exactas, Físicas y Naturales. Universidad Nacional de Córdoba, Argentina* **1939**, 2, 73–78.
- Genth, F.A. Aguilarite, a new species. *Amer. J. Sci. Third Series*. **1891**, 41, 401–402.
- Herzenberg, R.; Ahlfeld, F. Blockit, ein neues selenit aus Bolivien. *Zentralblatt Mineral. Geol. Paläontol.* **1935**, 6, 277–279 (in German).
- Kampf, A.R.; Mills, S.J.; Nash, B.P.; Thorne, B.; Favreau, G. Alfredopetrovite: A new selenite mineral from the El Dragón mine. *Eur. J. Mineral.* **2016**, 28, 479–484.

5. Vergasova, L.P.; Krivovichev, S.V.; Britvin, S.N.; Filatov, S.K.; Burns, P.K.; Ananyev, V.V. Allochalcocosite,  $\text{Cu}^+\text{Cu}^{2+}_5\text{PbO}_2(\text{SeO}_3)_2\text{Cl}_5$ —A new mineral from volcanic exhalations (Kamchatka, Russia). *Zap. Ross. Mineral. Obshch.* **2005**, *134*, 70–74 (in Russian).
6. Chen, L.; Zhang, Q.; Li, D.; Wang, G. Antimonselite, a new mineral. *Acta Mineral. Sin.* **1993**, *13*, 7–11 (in Chinese).
7. Harris, D.C.; Cabri, L.J.; Kaiman, S. Athabascaite: A new copper selenide mineral from Martin Lake, Saskatchewan. *Can. Mineral.* **1970**, *10*, 207–215.
8. Harris, D.C.; Nuffield, E.W. Bambollaite, a new copper telluro-selenide. *Can. Mineral.*, **1972**, *11*, 738–742
9. de Montreuil, L.A. Bellidoite: A new copper selenide. *Econ. Geol.* **1975**, *70*, 384–387.
10. Beudant, F.S. Berzeline, cuivre sélénié. *Traité Élémentaire de Minéralogie. 2<sup>nd</sup> Edition, Paris* **1832**, 534–534.
11. Banas, M.; Ottemann, J. Bohdanowiczyt - nowy naturalny selenek srebra i bizmutu z Kletna w Sudetach. *Przegląd Geologiczny* **1967**, *15*, 240–240. [In Polish]
12. Ramdohr, P.; Schmitt, M. Vier neue natürliche Kobaltselenide vom Steinbruch Trogtal bei Laufenthal im Harz. *Neues Jahrb. Mineral. Monatsh.* **1955**, 133–142 (in German).
13. Paar, W.H.; Topa, D.; Roberts, A.C.; Criddle, A.J.; Amann, G.; Sureda, R.J. The new mineral species brodtkorbite,  $\text{Cu}_2\text{HgSe}_2$ , and the associated selenide assemblage from Tuminico, Sierra de Cacho, La Rioja, Argentina. *Can. Mineral.* **2002**, *40*, 225–237.
14. Johan, Z.; Kvaček, M. Bukovite,  $\text{Cu}_{3+x}\text{Tl}_2\text{FeSe}_{4-x}$ , new Miner. *Bull. Soc. Franç. Minéral. Cristallogr.* **1971**, *94*, 529–533. [In French]
15. Krivovichev, S.V.; Vergasova, L.P.; Starova, G.L.; Filatov, S.K.; Britvin, S.N.; Roberts, A.C.; Steele, I.M. Burnsite,  $\text{KCdCu}_7\text{O}_2(\text{SeO}_3)_2\text{Cl}_9$ , a new mineral species from the Tolbachik Volcano, Kamchatka Peninsula, Russia. *Can. Mineral.* **2002**, *40*, 1171–1175.
16. Škácha, P.; Sejkora, J.; Plášil, J. Bytízite, a new Cu-Sb selenide from Příbram, Czech Republic. *Mineral. Mag.* **2018**, *82*, 199–209.
17. Bur'yanova, E.Z.; Kovalev, G.A.; Komkov, A.I. The new mineral cadmoselite. *Zap. Vsesoyuzn. Mineral. Obshch.* **1957**, *86*, 626–628 (in Russian).
18. Konnert, J.A.; Evans, H.T.; McGee, J.J.; Ericksen, G.E. Mineralogical studies of the nitrate deposits of Chile: VII. two new saline minerals with the composition  $\text{K}_6(\text{Na,K})_4\text{Na}_6\text{Mg}_{10}(\text{XO}_4)_{12}(\text{IO}_3)_{12}\cdot 12\text{H}_2\text{O}$ : fuenzalidaite ( $\text{X} = \text{S}$ ) and carlosruizite ( $\text{X} = \text{Se}$ ). *Amer. Mineral.* **1994**, *79*, 1003–1008.
19. Förster, H.-J.; Bindi, L.; Grundmann, G.; Stanley, C.J. Cerromojonite,  $\text{CuPbBiSe}_3$ , from El Dragón (Bolivia): A New Member of the Bourmonite Group. *Minerals* **2018**, *8*, 420.
20. Des Cloizeaux, A.; Damour, A.A. Note sur la chalcoménite, nouvelle espèce minérale (sélénite de cuivre). *Bull. Soc. Franç. Minéral.* **1881**, *4*, 51–55.
21. Johan, Z.; Picot, P.; Ruhlmann, F. Evolution paragenétique de la minéralisation uranifère de Chaméane (Puy-de-Dôme), France: chaméanite, geffroyite et giraudite, trois séléniures nouveaux de Cu, Fe, Ag et As. *Tscherm. Min. Petr. Mitt.* **1982**, *29*, 151–167 (in French).
22. Vergasova, L.; Krivovichev, S.; Semenova, T.; Filatov, S.; Ananiev, V. Chloromenite,  $\text{Cu}_9\text{O}_2(\text{SeO}_3)_4\text{Cl}_6$ , a new mineral from the Tolbachik volcano, Kamchatka, Russia. *Eur. J. Mineral.* **1999**, *11*, 119–123.
23. Paar, W.H.; Roberts, A.C.; Criddle, A.J.; Topa, D. A new mineral, chrisstanleyite,  $\text{Ag}_2\text{Pd}_3\text{Se}_4$ , from Hope's Nose, Torquay, Devon, England. *Mineral. Mag.* **1998**, *62*, 257–26.
24. Beudant, F.S. Claushalie, plomb sélénié. In *Traité Élémentaire de Minéralogie*, 2<sup>nd</sup> Ed.; Verdrière: Paris, France, 1832; pp. 531–534.
25. Bertrand, E. Sur la molybdoménite (sélénite de plomb), la cobaltoménite (sélénite de cobalt) et l'acide sélénieux de Cacheuta (La Plata). *Bull. Soc. Minéral. Franç.* **1882**, *5*, 90–92.
26. Nordenskiöld, A.E. Sur les minéraux sélénifères et thallifères de Skrikerum. *Bull. Mensuel Soc. Chim Paris* **1867**, *7*, 409–414.
27. Cesbron, F.; Bachet, B.; Oosterbosch, R. La demesmaekerite, sélénite hydraté d'uranium, cuivre et plomb. *Bull. Soc. Franç. Minéral. Cristallogr.* **1965**, *88*, 422–425. [In French]
28. Cesbron, F.; Pierrot, R.; Verbeek, T. La derriksite,  $\text{Cu}_4(\text{UO}_2)(\text{SeO}_3)_2(\text{OH})_6\cdot\text{H}_2\text{O}$ , une nouvelle espèce minérale. *Bull. Soc. Franç. Minéral. Cristallogr.* **1971**, *94*, 534–537. [In French]
29. Finkelman, R.B.; Mrose, M.E. Downeyite, the first verified natural occurrence of  $\text{SeO}_2$ . *Amer. Mineral.* **1977**, *62*, 316–320.
30. Cech, F.; Rieder, M.; Vrana, S. Drysdallite,  $\text{MoSe}_2$ , a new mineral. *Neues Jahrb. Mineral. Monatsh.* **1973**, 433–442.

31. Yashunsky, Y.V.; Ryabeva, E.G.; Abramov, M.V.; Rasulova, S.D. Dzharkenite  $\text{FeSe}_2$ —The new mineral. *Zap. Vseros. Mineral. Obshch.* **1995**, *124*, 85–90 (in Russian).
32. Paar, W.H.; Cooper, M.A.; Moëlo, Y.; Stanley, C.J.; Putz, H.; Topa, D.; Roberts, A.C.; Stirling, J.; Raith, J.G.; Rowe, R. Eldragónite,  $\text{Cu}_6\text{BiSe}_4(\text{Se})_2$ , a new mineral species from the El Dragón mine, Potosí, Bolivia, and its crystal structure. *Can. Mineral.* **2012**, *50*, 281–294.
33. Ramdohr, P. Neue erzminerale. *Fortschrit. Mineral.* **1949**, *28*, 69–70 (In German).
34. Berzelius, J. III. Undersökning af några föreningar, som bero af svagare frändskaper 12. Undersökning om förekommandet af selenium i mineralriket. *Afhandlingar i Fysik, Kemi och Mineralogi* **1818**, *6*, 134–144. [In Swedish]
35. Mills, S.J.; Kampf, A.R.; Christy, A.G.; Housley, R.M.; Thorne, B.; Chen, Y.-S.; Steele, I.M. Favreaute, a new selenite mineral from the El Dragón mine, Bolivia. *Eur. J. Mineral.* **2014**, *26*, 771–781.
36. Buryanova, E.Z.; Komkov, A.I. A new mineral—Feroselite. *Dokl. Akad. Nauk SSSR.* **1955**, *105*, 812–813 (in Russian).
37. Johan, Z.; Picot, P.; Pierrot, R.; Kvaček, M. Fischesserite,  $\text{Ag}_3\text{AuSe}_2$ , the first selenide isotype of petzite. *Bull. Soc. Franç. Minéral. Cristallogr.* **1976**, *94*, 381–384.
38. Pring, A.; Gatehouse, B.M.; Birch, W.D. Francisite,  $\text{Cu}_3\text{Bi}(\text{SeO}_3)_2\text{O}_2\text{Cl}$ , new mineral from Iron Monarch, South Australia: description and crystal structure. *Amer. Mineral.* **1990**, *75*, 1421–1425.
39. Strunz, H. NiAs-typus und verwandte: Freiboldit. In *Mineralogische Tabellen*. 3<sup>rd</sup> ed.; Geest and Portig: Leipzig, Germany, 1957; pp. 98–98
40. Vergasova, L.P.; Semenova, T.F.; Filatov, S.K.; Krivovichev, S.V.; Shuvalov, R.R.; Anan'ev, V.V. Georgbokiite  $\text{Cu}_3\text{O}_2(\text{SeO}_3)_2\text{Cl}_2$ —A new mineral from volcanic exhalations. *Dokl. Akad. Nauk SSSR* **1999**, *364*, 527–531 (in Russian).
41. Förster, H.-J.; Bindi, L.; Stanley, C.J. Grundmannite,  $\text{CuBiSe}_2$ , the Se-analogue of emplectite: A new mineral from the El Dragón mine, Potosí, Bolivia. *Eur. J. Mineral.* **2016**, *28*, 467–477.
42. Castillo, D.A. Descubrimiento de una nueva especie mineral de bismuto. *La Naturaleza.* **1873**, *2*, 274–276.
43. Pierrot, R.; Toussaint, J.; Verbeek, T. La guilleminite, une nouvelle espèce minérale. *Bull. Soc. Franç. Minéral. Cristallogr.* **1965**, *88*, 132–135 (in French).
44. Johan, Z.; Kvaček, M. Hakite, new mineral of the tetrahedrite group. *Bull. Soc. Franç. Minéral. Cristallogr.* **1971**, *94*, 45–48.
45. Förster, H.-J.; Bindi, L.; Stanley, C.J.; Grundmann, G. Hansblockite,  $(\text{Cu,Hg})(\text{Bi,Pb})\text{Se}_2$ , the monoclinic polymorph of grundmannite, a new mineral from the Se mineralization at El Dragón (Bolivia). *Mineral. Mag.* **2017**, *81*, 629–640.
46. Deliens, M.; Piret, P. La haynesite, sélénite hydraté d'uranyle, nouvelle espèce minérale de la Mine Repete, Comté de San Juan, Utah. *Can. Mineral.* **1991**, *29*, 561–564
47. Vergasova, L.P.; Semenova, T.F.; Shuvalov, R.R.; Filatov, S.K.; Anan'yev, V.V. Ilinskite  $\text{NaCu}_5\text{O}_2(\text{SeO}_3)_2\text{Cl}_3$  - a new mineral of volcanic exhalations. *Dokl. Akad. Nauk.* **1997**, *353*(5), 641–644 (in Russian).
48. Vymazalová, A.; Laufek, F.; Drábek, M.; Cabral, A.R.; Haloda, J.; Sidorinová, T.; Lehmann, B.; Galbiatti, H.F.; Drahoukoupil, J. Jacutingaite,  $\text{PtHgSe}_3$ , a new platinum-group mineral species from the Cauê iron-ore deposit, Itabira District, Minas Gerais, Brazil. *Can. Mineral.* **2012**, *50*, 431–440.
49. Paar, W.H.; Topa, D.; Makovicky, E.; Sureda, R.J.; de Brodtkorb, M.K.; Nickel, E.H.; Putz, H. Jaguéite,  $\text{Cu}_2\text{Pd}_3\text{Se}_4$ , a new mineral species from El Chire, La Rioja, Argentina. *Can. Mineral.* **2004**, *42*, 1745–1755.
50. Cabri, L.J.; Laflamme, J.H.G.; Roberts, A.C.; Criddle, A.J.; Hulbert, L.J. Jolliffeite and unnamed  $\text{CoAsSe}$ : Two new arsenoselenides from the north shore of Lake Athabasca, Saskatchewan. *Can. Mineral.* **1991**, *29*, 411–418.
51. Botelho, N.F.; Moutra, M.A.; Peterson, R. C.; Stanley, C.J.; Silva, D.V.G. Kalungaite,  $\text{PdAsSe}$ , a new platinum-group mineral from the Buraco do Ouro gold mine, Cavalcante, Goiás State, Brazil. *Mineral. Mag.* **2006**, *70*, 123–130.
52. Kato, A. Kawazulite  $\text{Bi}_2\text{Te}_2\text{S}$ . *Introduction to Japanese Minerals, Geological Survey of Japan.* **1970**, *39*, 87–88
53. Häkli, T.A.; Vuorelainen, Y.; Sahama, G.Th. Kitkaite ( $\text{NiTeSe}$ ), a new mineral from Kuusamo, northeast Finland. *Amer. Mineral.* **1965**, *50*, 581–586.
54. Johan, Z.; Picot, P.; Kvaček, M. La krut'aite,  $\text{CuSe}_2$ , un nouveau minéral du groupe de la pyrite. *Bull. Soc. Fr. Minéral. Cristallogr.* **1972**, *95*, 475–481. [In French]
55. Vuorelainen, Y.; Huhma, A.; Häkli, A. Sederholmite, wilkmanite, kullerudite, mäkinenite, and trüstedtite, five new nickel selenide minerals. *Comptes Rendus de la Société Géologique de Finlande.* **1964**, *36*, 113–125.



56. Kovalenker, V.A.; Plotinskaya, O.Y.; Stanley, C.J.; Roberts, A.C.; McDonald, A.M.; Cooper, M.A. Kurilite -  $\text{Ag}_8\text{Te}_3\text{Se}$  - a new mineral from the Prasolovskoe deposit, Kuril islands, Russian Federation. *Mineral. Mag.* **2010**, *74*, 463–468.
57. Vorma, A. Laitakariitti Uusi Bi-Se-mineraali Orijärveltä. *Geologi.* **1959**, *11*, 11–11. [In Finish]
58. Dunn, P.J.; Peacor, D.R.; Criddle, A.J.; Finkelman, R.B. Laphamite, an arsenic selenide analogue of orpiment, from burning anthracite deposits in Pennsylvania. *Mineral. Mag.* **1986**, *50*, 279–282.
59. Chukanov, N.V.; Pushcharovsky, D.Yu.; Pasero, M.; Merlino, S.; Barinova, A.V.; Möckel, S.; Pekov, I.V.; Zadov, A.E.; Dubinchuk, V.T. Larisaite,  $\text{Na}(\text{H}_3\text{O})(\text{UO}_2)_3(\text{SeO}_3)_2\text{O}_2 \cdot 4\text{H}_2\text{O}$ , a new uranyl selenite mineral from Repete mine, San Juan County, Utah, U.S.A. *Eur. J. Mineral.* **2004**, *16*, 367–374.
60. Sejkora, J.; Makovicky, E.; Topa, D.; Putz, H.; Zagler, G.; Plašil, J. Litochlebite,  $\text{Ag}_2\text{PbBi}_4\text{Se}_8$ , a new selenide mineral species from Zálesí, Czech Republic, description and crystal structure. *Can. Mineral.* **2011**, *49*, 639–650.
61. Lengauer, C.L.; Ende, M.; Topa, D.; Lira, R. and Paar, W.H. Llantenesite, IMA 2018-111. CNMNC Newsletter No. 47. *Eur. J. Mineral.* **2019**, *31*, 201–201.
62. Jebwab, J., Cervelle, B., Gouet, G., Hubaut, X., Piret, P. The new platinum selenide luberoite  $\text{Pt}_5\text{Se}_4$  from the Lubero region (Kivu Province, Zaire). *Eur. J. Mineral.* **1992**, *4*, 683–692.
63. Philippo, S.; Hatert, F.; Bruni, Y.; Vignola, P. Luxembourgite, IMA 2018-154. CNMNC Newsletter No. 49. *Mineral. Mag.* **2019**, *83*, 323–328.
64. Dunn, P.J.; Peacor, D.R.; Sturman, B.D. Mandarinite, a new ferric-iron selenite from Bolivia. *Can. Mineral.* **1978**, *16*, 605–609.
65. Cesbron, F.; Oosterbosch, R.; Pierrot, R. Une nouvelle espèce minérale: la marthozite. Uranyl-sélénite de cuivre hydraté. *Bull. Soc. Franç. Minéral. Cristallogr.* **1969**, *92*, 278–283. [In French]
66. Dymkov, Y.M.; Loseva, T.I.; Zav'yalov, E.N.; Ryzhov, B.I.; Bochek, L.I. Mgriite,  $(\text{Cu},\text{Fe})_3\text{AsSe}_3$ , a new Miner. *Zap. Vsesoyuzn. Mineral. Obshch.* **1982**, *111*, 215–219 (in Russian).
67. Kojonen, K.K.; Tarkian, M.; Roberts, A.C.; Törnroos, R.; Heidrich, S. Miessiite,  $\text{Pd}_{11}\text{Te}_2\text{Se}_2$ , a new mineral species from Miessijoki, Finnish Lapland, Finland. *Can. Mineral.* **2007**, *45*, 1221–1227.
68. Paar, W.H.; Topa, D.; Makovicky, E.; Culetto, F.J. Milotaite,  $\text{PdSbSe}$ , a new palladium mineral species from Předbořice, Czech Republic. *Can. Mineral.* **2005**, *43*, 689–694.
69. Matsubara, S.; Mouri, T.; Miyawaki, R.; Yokoyama, K.; Nakahara, M. Munakataite, a new mineral from the Kato mine, Fukuoka, Japan. *J. Mineral. Petrol. Sci.* **2008**, *103*, 327–332.
70. Haidinger, W. Zweite Klasse: Geogenide. XIV. Ordnung. Glanze. III. Silberglanz. Naumannit. *Handbuch der Bestimmenden Mineralogie.* Bei Braumüller and Seidel: Wien, Austria **1845**; ss. 563-570.
71. Kasatkin, A.V.; Plášil, J.; Marty, J.; Agakhanov, A.A.; Belakovskiy, D.I.; Lykova, I.S. Nestolaite,  $\text{CaSeO}_3 \cdot \text{H}_2\text{O}$ , a new mineral from the Little Eva mine, Grand County, Utah, USA. *Mineral. Mag.* **2014**, *78*, 497–505.
72. Nechelyustov, G.N.; Christyakova, N.I.; Zav'yalov, E.N. Nevskite,  $\text{Bi}(\text{Se}, \text{S})$ , a new bismuth selenide. *Zap. Vsesoyuzn. Mineral. Obshch.* **1984**, *113*(3), 351-355 (in Russian).
73. Förster, H.-J.; Ma, C.; Grundmann, G.; Bindi, L.; Stanley, C.J. Nickeltyrrellite, IMA 2018-110. CNMNC Newsletter No. 47; *Mineral. Mag.* **2019**, *83*, 143–143.
74. Vergasova, L.P.; Semenova, T.F.; Krivovichev, S.V.; Filatov, S.K.; Zolotarev, A.A.; Ananiev, V.V. Nicksobolevite,  $\text{Cu}_7(\text{SeO}_3)_2\text{O}_2\text{Cl}_6$ , a new complex copper oxoselenite chloride from Tolbachik fumaroles, Kamchatka peninsula, Russia. *Eur. J. Mineral.* **2014**, *26*, 439–449.
75. Hurlbut, C.S.; Aristarain, L.F. Olsacherite,  $\text{Pb}_2(\text{SO}_4)(\text{SeO}_4)$ , a new mineral from Bolivia. *Amer. Mineral.* **1969**, *54*, 1519–1527.
76. Johan, Z.; Picot, P.; Pierrot, R. L'oosterboschite  $(\text{Pd}, \text{Cu})_7\text{Se}_5$ , une nouvelle espèce minérale et la trogtalite cupro-palladifère de Musonoï (Katanga). *Bull. Soc. Franç. Minéral. Cristallogr.* **1970**, *93*, 476–481 (in French).
77. Campostrini, I.; Gramaccioli, C.M.; Demartin, F. Orlandiite,  $\text{Pb}_3\text{Cl}_4(\text{SeO}_3) \cdot \text{H}_2\text{O}$ , a new mineral species, and an associated lead-copper selenite chloride from the Baccu Locci mine, Sardinia, Italy. *Can. Mineral.* **1999**, *37*, 1493–1498.
78. Polekhovskij, Y.S.; Voloshin, A.V.; Tarasova, I.P.; Nikitin, S.A.; Pakhomovskij, Y.A.; Men'shikov, Y.P.; Kretzer, Y.L.; Kolytsheva, T.I. Padmaite  $\text{PdBiSe}$ —A new selenide of palladium and bismuth from metasomatites of the southern Karelia. *Zap. Vsesoyuzn. Mineral. Obshch.* **1991**, *120*, 85–88 (in Russian).
79. Davis, R.J.; Clark, A.M.; Criddle, A.J. Palladseite, a new mineral from Itabira, Minas Gerais, Brazil. *Mineral. Mag.* **1977**, *41*, 123–123.

80. Vergasova, L.P.; Krivovichev, S.V.; Filatov, S.K.; Britvin, S.N.; Burns, P.K.; Ananyev, V.V. Parageorgbokiite,  $\beta$ - $\text{Cu}_5\text{O}_2(\text{SeO}_3)_2\text{Cl}_2$ —A new mineral from volcanic Exhalation (Kamchatka Peninsula, Russia). *Zap. Ros. Mineral. Obshch.* **2006**, *135*, 24–28 (in Russian).
81. Ramdohr, P. Las especies mineralógicas guanajuatita y paraganajuatita. *Comite Directivo Investido recursos Minerales de Mexico Boletín* **1948**, *20*, 1-15.
82. Kampf, A.R.; Mills, S.J.; Nash, B.P. Pauladamsite,  $\text{Cu}_4(\text{SeO}_3)(\text{SO}_4)(\text{OH})_4 \cdot 2\text{H}_2\text{O}$ , a new mineral from the Santa Rosa mine, Darwin district, California, USA. *Mineral. Mag.* **2016**, *80*, 949–958.
83. Gordon, S.G. Proceedings of societies: Penroseite and trudellite, two new minerals. *Amer. Mineral.* **1926**, *11*, 39–43.
84. Johan, Z.; Picot, P.; Pierrot, R.; Kvaček, M. Permingeatite  $\text{Cu}_3\text{SbSe}_4$ , new mineral of the luzonite group. *Bull. Soc. Franç. Minéral. Cristallogr.* **1971**, *94*, 162–165 (in French).
85. Bindi, L.; Förster, H.J.; Grundmann, G.; Keutsch, F.N.; Stanley, C.J. Petříčekite,  $\text{CuSe}_2$ , a new member of the marcasite group from the Předbořice Deposit, Central Bohemia Region, Czech Republic. *Minerals* **2016**, *6*, 33.
86. Johan, Z.; Kvaček, M.; Picot, P. Petrovicite,  $\text{Cu}_3\text{HgPbBiSe}_5$ , new Mineral. *Bull. Soc. Franç. Minéral. Cristallogr.* **1976**, *99*, 310–313.
87. Vochten, R.; Blaton, N.; Peeters, O.; Deliens, M. Piretite,  $\text{Ca}(\text{UO}_2)_3(\text{SeO}_3)_2(\text{OH})_4 \cdot 4\text{H}_2\text{O}$ , a new calcium uranyl selenite from Shinkolobwe, Shaba, Zaire. *Can. Mineral.* **1996**, *34*, 1317–1322.
88. Kampf, A.R.; Mills, S.J.; Pinch, W.W. Plumboselite,  $\text{Pb}_3\text{O}_2(\text{SeO}_3)$ , a new oxidation-zone mineral from Tsumeb, Namibia. *Mineral. Petrol.* **2011**, *101*, 75–80.
89. Čech, F.; Vavřín, I. Poubaitite,  $\text{PbBi}_2(\text{Se}, \text{Te}, \text{S})_4$ , a new Mineral. *Neues Jahrb. Mineral. Monatsh.* **1978**, 9–19.
90. Shuvalov, R.R.; Vergasova, L.P.; Semenova, T.F.; Filatov, S.K.; Krivovichev, S.V.; Siidra, O.I.; Rudashevsky, N.S. Prewittite,  $\text{KPb}_{1.5}\text{Cu}_6\text{Zn}(\text{SeO}_3)_2\text{O}_2\text{Cl}_{10}$ , a new mineral from Tolbachik fumaroles, Kamchatka peninsula, Russia: Description and crystal structure. *Amer. Mineral.* **2013**, *98*, 463–469.
91. Škácha, P.; Sejkora, J.; Plášil, J. Příbramite,  $\text{CuSbSe}_2$ , the Se-analogue of chalcostibite, a new mineral from Příbram, Czech Republic. *Eur. J. Mineral.* **2017**, *29*, 653–661.
92. Förster, H.-J.; Bindi, L.; Grundmann, G.; Stanley, C. Quijarroite,  $\text{Cu}_6\text{HgPb}_2\text{Bi}_4\text{Se}_{12}$ , a New Selenide from the El Dragón Mine, Bolivia. *Minerals* **2016**, *6*, 123.
93. Lengauer, C.L.; Ende, M.; Topa, D.; Lira, R.; Paar, W.H. Ramaccioniite, IMA 2018-082. CNMNC Newsletter No. 46; *Mineral. Mag.* **2018**, *82*, 1371–1371.
94. Johan, Z.; Kvaček, M.; Picot, P. Sabatierite, new selenide of copper and thallium. *Bull. Minéral.* **1978**, *101*, 557–560.
95. Gemmi, M.; Campostrini, I.; Demartin, F.; Gorelik, T.E.; Gamaccioli, C.M. Structure of the new mineral sarrabusite,  $\text{Pb}_5\text{CuCl}_4(\text{SeO}_3)_4$ , solved by manual electron-diffraction tomography. *Acta Crystallographica.* **2012**, *B68*, 15-23.
96. Förster, H.J.; Cooper, M.A.; Roberts, A.C.; Stanley, C.J.; Criddle, A.J.; Hawthorne, F.C.; Laflamme, J.H.G.; Tischendorf, G. Schlemaitite,  $(\text{Cu}, \square)_6(\text{Pb}, \text{Bi})\text{Se}_4$ , a new mineral species from Niederschlema-Alberoda, Erzgebirge, Germany: Description and crystal structure. *Can. Mineral.* **2003**, *41*, 1433–1444.
97. Hey, M.H. Selenites, selenates, tellurites, and tellurates. Schmiederite. in *Appendix to the second edition of an index of mineral species and varieties arranged chemically*. Printed by order of the Trustees of the British Museum **1963**, 84–84.
98. Palache, C. Contributions to crystallography: Claudetite; minasragrite; samsonite; native selenium; indium. *Amer. Mineral.* **1934**, *19*, 194-205.
99. Bindi, L.; Pratesi, G. Selenojalpaite,  $\text{Ag}_3\text{CuSe}_2$ , a new mineral species from the Skrikerum Cu-Ag-Ti selenide deposit, Småland, southeastern Sweden. *Can. Mineral.* **2005**, *43*, 1373–1377.
100. Bindi, L.; Evain, M.; Menchetti, S. Selenopolybasite,  $[(\text{Ag}, \text{Cu})_6(\text{Sb}, \text{As})_2(\text{S}, \text{Se})_7][\text{Ag}_9\text{Cu}(\text{S}, \text{Se})_2\text{Se}_2]$ , a new member of the pearceite-polybasite group from the De Lamar mine, Owyhee County, Idaho, USA. *Can. Mineral.* **2007**, *45*, 1525–1528.
101. Botova, M.M.; Sandomirskaya, S.M.; Tschuvikina, N.G. Selenostephanite  $\text{Ag}_5\text{Sb}(\text{Se}, \text{S})_4$ —a new mineral. *Zap. Vsesoyuzn. Mineral. Obshch.* **1985**, *114*, 627–630 (in Russian).
102. Johan, Z.; Picot, P.; Ruhlmann, F. The ore mineralogy of the Otish Mountains uranium deposit, Quebec: Skippenite,  $\text{Bi}_2\text{Se}_2\text{Te}$ , and watkinsonite,  $\text{Cu}_2\text{PbBi}_4(\text{Se}, \text{S})_8$ , two new mineral species. *Can. Mineral.* **1987**, *25*, 625–638.

103. Vergasova, L.P.; Filatov, S.K.; Semenova, T.F.; Filosofova, T.M. Sofiite  $Zn_2(SeO_3)Cl_2$  - a new mineral from volcanic sublimates. *Zap. Vsesoyuzn. Mineral. Obshch.* **1989**, *118*, 65–69 (in Russian).
104. Ramdohr, P. Stilleit, ein neues Mineral, natürliches Zinkselenid, von Shinkolobwe. *Z. Deutsch. Geol. Gesellschaft.* **1956**, *1*, 481–483 (in German).
105. Polekhovskiy, Y.S.; Tarasova, I.P.; Nesterov, A.P.; Pakhomovskiy, Y.A.; Bakhchisaraitsev, A.Y. Sudovikovite  $PtSe_2$  - a new platinum selenide from Karelia metasomite. *Dokl. Akad. Nauk* **1997**, *354*, 82–85 (in Russian).
106. Ridkossil, T.; Skala, R.; Johan, Z.; Srein, V. Telluronevskite,  $Bi_3TeSe_2$ , a new mineral. *Eur. J. Mineral.* **2001**, *13*, 177–185.
107. Naumann, C.F. XI. Classe. Galenoide oder Glanze. B. Selenische Glanze. 531. Selenmercur oder Tiemannit. in *Elemente der Mineralogie*. Wilhelm Engelmann: Leipzig, Germany, 1855; pp. 425–425.
108. Stanley, C.J.; Criddle, A.J.; Förster, H.J.; Roberts, A.C. Tischendorfite,  $Pd_3Hg_3Se_9$ , a new mineral species from Tilkerode, Harz Mountains, Germany. *Can. Mineral.* **2002**, *40*, 739–745.
109. Robinson, S.C.; Brooker, E.J. Notes and news: a cobalt-nickel-copper selenide from the Goldfields District, Saskatchewan. *Amer. Mineral.* **1952**, *37*, 542–544.
110. Klockmann, F. Mineralogische mittheilungen aus den sammlungen der Bergakademie zu Clausthal. *Z. Krystallogr. Mineral.* **1891**, *19*, 265–275.
111. Roberts, A.C.; Paar, W.H.; Cooper, M.A.; Topa, D.; Criddle, A.J.; Jedwab, J. Verbeekite, monoclinic  $PdSe_2$ , a new mineral from the Musonoi Cu-Co-Mn-U mine, near Kolwezi, Shaba Province, Democratic Republic of Congo. *Mineral. Mag.* **2002**, *66*, 173–179.
112. Skála, R.; Ondrus, P.; Veselovký, F.; Táborský, Z.; Duda, R. Vihorlatite,  $Be_{24}Se_{17}Te_4$ , a new mineral of the tetradymite group from Vihorlat Mts., Slovakia. *Eur. J. Mineral.* **2007**, *19*, 255–265
113. Pekov, I.V.; Zubkova, N.V.; Yapaskurt, V.O.; Britvin, S.N.; Chukanov, N.V.; Lykova, I.S.; Sidorov, E.G.; Pushcharovsky, D.Y. Zincomenite,  $ZnSeO_3$ , a new mineral from the Tolbachik volcano, Kamchatka, Russia. *Eur. J. Mineral.* **2016**, *28*, 997–1004.
